# Supplementary material for: Altered platelet-megakaryocyte endocytosis and trafficking of albumin and fibrinogen in RUNX1 haplodeficiency
Source: PubMed Central journal article supplement — Blood Adv. 2024 Feb 10;8(7):1699–714. doi: 10.1182/bloodadvances.2023011098 (PMC10997914; doi:10.1182/bloodadvances.2023011098), 2024-02-10
Supplement: BLOODA_ADV-2023-011098-mmc1.pdf [file BLOODA_ADV-2023-011098-mmc1.pdf]

**Supplemental Table 1. List of antibodies used for immunoblots and immunofluorescence studies:**

| Primary Antibody                                                | Source               | Reactivity                   | Supplier             | Reference  |
|-----------------------------------------------------------------|----------------------|------------------------------|----------------------|------------|
| <b>Albumin</b>                                                  | Monoclonal<br>Rabbit | Human, mouse, rat,<br>cow    | Abcam                | ab192603   |
| <b>ARF6</b>                                                     | Polyclonal<br>Rabbit | Human, mouse, rat            | Proteintech          | 20225-1-AP |
| <b>Caveolin-1</b>                                               | Polyclonal<br>Rabbit | Human, rat, mouse            | Cell Signaling       | 3238S      |
| <b>Clathrin heavy chain</b>                                     | Monoclonal<br>Mouse  | Human, mouse, rat,<br>bovine | Novus<br>Biologicals | NB300-613  |
| <b>Dynamin-2</b>                                                | Polyclonal<br>Rabbit | Human, mouse, rat            | Cell Signaling       | 2342S      |
| <b>PAC1 (FITC-labeled)</b>                                      | Mouse anti-<br>human | Human, mouse                 | BD Biosciences       | 340507     |
| <b>Flotillin-1</b>                                              | Polyclonal<br>Rabbit | Human, rat, mouse            | Cell Signaling       | 3253S      |
| <b>IFITM3</b>                                                   | Polyclonal<br>Rabbit | Human, mouse, rat            | Proteintech          | 11714-1-AP |
| <b>Integrin <math>\alpha</math>IIb -FITC labeled clone-HIP8</b> | Mouse anti-<br>human | Human, mouse                 | BD Biosciences       | 340929     |

|                                                            |                      |                   |                             |           |
|------------------------------------------------------------|----------------------|-------------------|-----------------------------|-----------|
| <b>Integrin <math>\alpha</math>IIb</b>                     | Monoclonal<br>Mouse  | Human, mouse      | Santa Cruz<br>Biotechnology | sc-365938 |
| <b>Integrin <math>\beta</math>3</b>                        | Monoclonal<br>Rabbit | Human, mouse      | Cell Signaling              | 13166S    |
| <b>IRDye- IgG labeled<br/>680/800 RD<br/>Sec. antibody</b> | Donkey               | Human, mouse      | Li-Cor<br>Biosciences       | 926-68072 |
| <b>LAMP2 CD107b</b>                                        | Polyclonal<br>Mouse  | Human             | Biologend                   | 354302    |
| <b>Myosin light chain</b>                                  | Monoclonal<br>Mouse  | Human, mouse      | Santa Cruz<br>Biotechnology | sc-48414  |
| <b>PF4 (anti-CXCL4)</b>                                    | Monoclonal<br>Human  | Human             | R&D Systems                 | IC-7952F  |
| <b>Phosphorylated -<br/>myosin light chain</b>             | Polyclonal<br>Rabbit | Human, mouse      | Cell Signaling              | 3674S     |
| <b>Rab11A/B</b>                                            | Monoclonal<br>Rabbit | Human, rat, mouse | Cell Signaling              | 5589      |
| <b>RUNX1</b>                                               | Monoclonal<br>Mouse  | Human, rat, mouse | Santa Cruz<br>Biotechnology | sc-365644 |
| <b><math>\beta</math>-actin</b>                            | Polyclonal<br>Mouse  | Human, mouse, rat | Santa Cruz<br>Biotechnology | sc-47778  |

**Supplemental Table 2. List of fluorescence labeled conjugated proteins or antibodies used for uptake studies:**

| <b>PROTEIN</b>                          | <b>CONJUGATES</b> | <b>SUPPLIER</b>                                | <b>REFERENCE</b> |
|-----------------------------------------|-------------------|------------------------------------------------|------------------|
| <b>Human Albumin</b>                    | Cy3-ChromePure    | Jackson<br>ImmunoResearch<br>Laboratories, Inc | 009-160-051      |
| <b>Human Albumin</b>                    | Alexa Fluor 488   | Jackson<br>ImmunoResearch<br>Laboratories, Inc | 009-540-051      |
| <b>Fibrinogen from<br/>Human plasma</b> | Alexa fluor 546   | Invitrogen/Thermo<br>Fisher sci                | F13192           |
| <b>Fibrinogen from<br/>Human plasma</b> | Alexa Fluor 647   | Invitrogen/Thermo<br>Fisher sci                | F35200           |
| <b>Human IgG (whole<br/>molecule)</b>   | Cy3-ChromePure    | Jackson<br>ImmunoResearch<br>Laboratories, Inc | 009-160-003      |
| <b>Fibrinogen from<br/>Human plasma</b> | Cy3- Fibrinogen   | ABBY monoclonal                                | Bsm-1240M-Cy3    |
| <b>Human IgG (whole<br/>molecule)</b>   | Alexa Fluor 488   | Jackson<br>ImmunoResearch<br>Laboratories, Inc | 009-000-003      |

## SUPPLEMENTAL FIGURES

### Figure S1

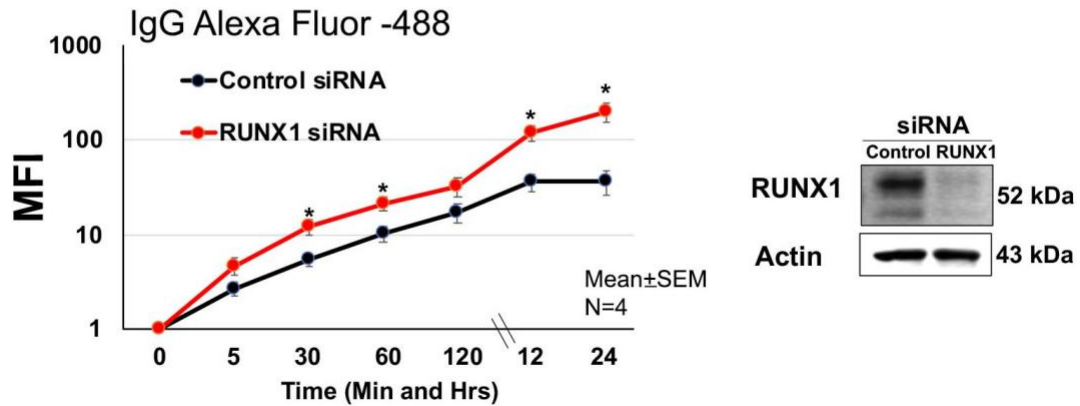

**Figure S1. Effect of *RUNX1* knockdown on IgG uptake in HEL cells.** HEL cells transfected with control or *RUNX1* siRNA were incubated with 10  $\mu$ g/mL IgG-Alexa 488 at 37°C for different time points, washed, fixed with 2% paraformaldehyde and analyzed by flow cytometry to assess IgG uptake. Shown is mean of MFI of two experiments. IgG uptake in *RUNX-1* deficient cells (red) was increased over time as compared to control cells (black). Also shown is a representative immunoblot showing *RUNX-1* expression with actin as loading control.

# Figure S2

**A.**

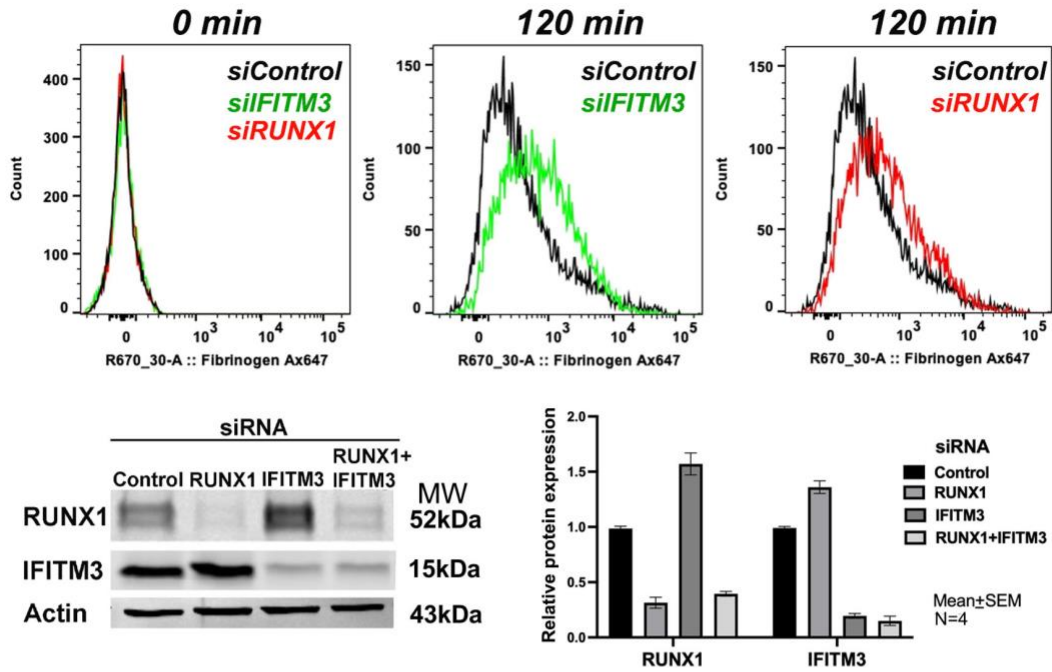

**B.**

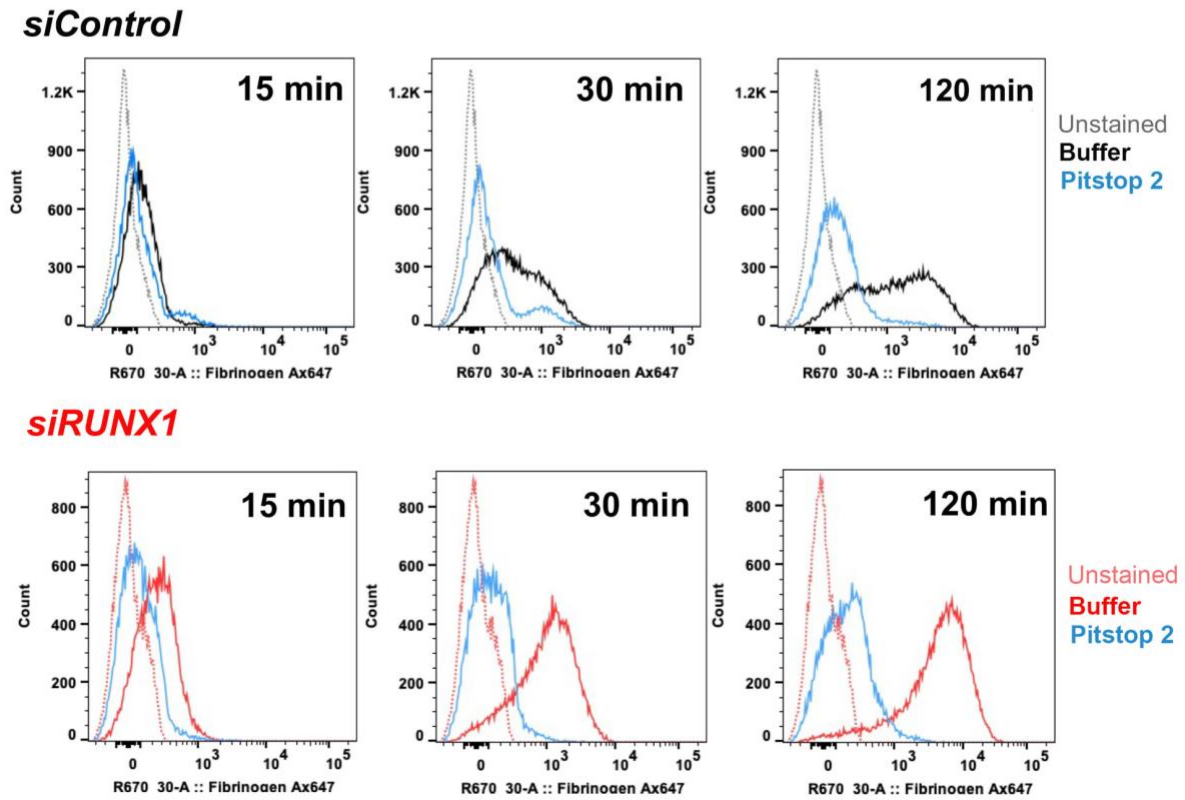

Figure S2. Effect of *IFITM3* knockdown on fibrinogen uptake in HEK cells.

**A.** Effect of knockdown of *IFITM3* or *RUNX1* on uptake of fibrinogen at 120 minutes by flow cytometry. HEL cells were transfected with siRNAs (100 nM) against *IFITM3* or *RUNX1*. Cells were incubated with 10  $\mu$ g/mL Alexa 647-fibrinogen in buffer for 120 minutes at 37°C, fixed and washed with buffer. Fibrinogen uptake was evaluated by flow cytometry. Left panel; 0 minutes. Middle panel: uptake at 120 minutes in *IFITM3 KD* cells (green) compared to control cells (black). The uptake of fibrinogen over 120 min was not inhibited on *IFITM3* knockdown. Right panel: uptake at 120 minutes in *RUNX1*-deficient cells (red) compared to control cells (black). Shown representative of 3 experiments. The immunoblots show the relative protein levels.

**B.** Effect of Pitstop 2 (inhibitor of clathrin-mediated uptake) on uptake and retention of fibrinogen over 120 min in control cells (top panels) and *RUNX1* siRNA treated HEL cells (lower panels) by flow cytometry. Cells were incubated with Pitstop 2 (30  $\mu$ M) for 15 minutes at room temperature. In the top panels: black lines, buffer; blue lines Pitstop 2. In the lower panels: red lines, buffer; blue lines, Pitstop 2. Shown is a representative of 2 experiments.

## Figure S3

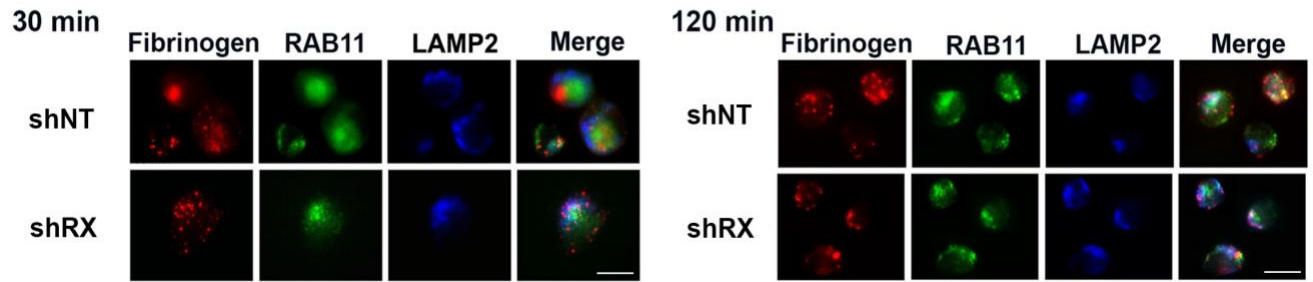

**Figure S3. Effect of shRNA RUNX1 knockdown in primary MK on fibrinogen colocalization with RAB11 and LAMP2 (30 and 120 minutes) by**

**immunofluorescence microscopy.** shNT and shRx cells were incubated with Alexa-647 fibrinogen for 30 and 120 min, fixed and immobilized on poly-lysine-coated coverslips. Representative images are shown. Fibrinogen is shown in red fluorescence. Cells were stained with anti-RAB11 (green) or anti-LAMP2 (blue) antibodies to assess colocalization as seen in merged images and evaluated by Nikon E1000 epifluorescence microscope.

## Figure S4

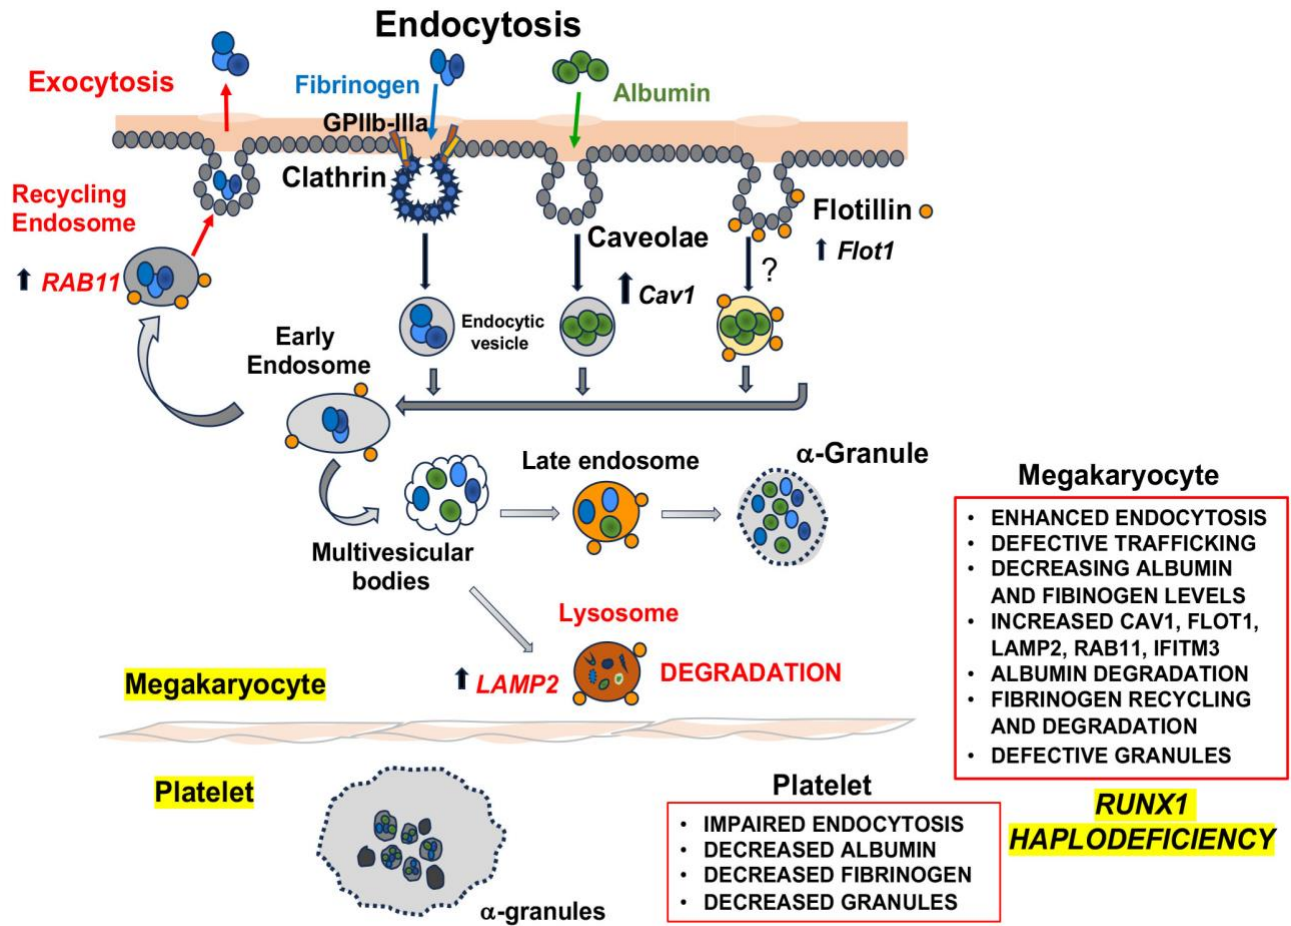

Figure S4 Schema showing the endocytic pathways and alterations in megakaryocytes and platelets in *RUNX1* haplodeficiency.
